# Supplementary material
Source: PubMed Central journal article supplement (PMC4198951)
Supplement: NIHMS603715-supplement-01.pdf [file NIHMS603715-supplement-01.pdf]

**Supplementary Table 1. Data collection and refinement statistics. Highest resolution shell is shown in parentheses.**

| Structure                                             | SANT1                  | AntaXV                                        | SAG1.5                                      |
|-------------------------------------------------------|------------------------|-----------------------------------------------|---------------------------------------------|
| Data collection                                       |                        |                                               |                                             |
| Wavelength (Å)                                        | 1.0332                 | 1.0332                                        | 1.0332                                      |
| Space group                                           | C222 <sub>1</sub>      | P2 <sub>1</sub> 2 <sub>1</sub> 2 <sub>1</sub> | C2                                          |
| Unit cell parameters<br><i>a, b, c</i> (Å)<br>$\beta$ | 84.64, 110.88, 145.21  | 42.83, 79.84, 170.07                          | 72.22, 158.93, 60.02<br>$\beta=90.26^\circ$ |
| Number of crystals                                    | 4                      | 6                                             | 35                                          |
| Number of reflections measured                        | 67,988                 | 133,741                                       | 353,034                                     |
| Number of unique reflections                          | 16,010                 | 17,421                                        | 18,991                                      |
| Resolution (Å)                                        | 50 – 2.80 (2.90– 2.80) | 50 – 2.60 (2.69 – 2.60)                       | 50 – 2.60 (2.69 -2.60)                      |
| R <sub>merge</sub> (%)                                | 12.0 (64.1)            | 9.1 (72.3)                                    | 12.9 (>100)                                 |
| Mean I/ $\sigma$ (I)                                  | 11.8 (1.4)             | 35.0 (2.0)                                    | 21.4 (1.8)                                  |
| Completeness (%)                                      | 94.5 (92.3)            | 94.4 (80.6)                                   | 87.5 (53.6)**                               |
| Redundancy                                            | 4.2 (4.3)              | 7.7 (6.3)                                     | 18.6 (14.3)                                 |
| Refinement                                            |                        |                                               |                                             |
| Resolution (Å)                                        | 50 – 2.80              | 50 – 2.61                                     | 50 – 2.60 (2.9, 2.5, 3.3)**                 |
| Number of reflections (test set)                      | 15,986 (776)           | 17,377 (901)                                  | 15,154 (755)                                |
| Rwork / Rfree                                         | 0.204 / 0.253          | 0.223 / 0.264                                 | 0.225 / 0.260                               |
| Number of atoms                                       |                        |                                               |                                             |
| Protein                                               | 3,570                  | 3,519                                         | 3,411                                       |
| Ligand                                                | 28                     | 33                                            | 36                                          |
| Zn                                                    | 2                      | 1                                             | 0                                           |
| Lipids and other                                      | 57                     | 23                                            | 7                                           |
| Mean Overall B value (Å <sup>2</sup> )                |                        |                                               |                                             |
| SMO                                                   | 80.6                   | 90.9                                          | 53.7                                        |
| BRIL                                                  | 82.2                   | 123.4                                         | 87.6                                        |
| Ligand                                                | 73.6                   | 71.7                                          | 41.0                                        |
| Zn                                                    | 71.5                   | 129.2                                         | n/a                                         |
| Lipids and other                                      | 96.9                   | 85.3                                          | 58.1                                        |
| R.m.s. deviations                                     |                        |                                               |                                             |
| Bond lengths (Å)                                      | 0.010                  | 0.010                                         | 0.010                                       |
| Bond angles (°)                                       | 1.08                   | 0.97                                          | 1.07                                        |
| Ramachandran plot statistics (%)*                     |                        |                                               |                                             |
| Favored regions                                       | 94.7                   | 97.1                                          | 94.8                                        |
| Allowed regions                                       | 5.3                    | 2.9                                           | 5.2                                         |
| Disallowed regions                                    | 0                      | 0                                             | 0                                           |

\* As defined in MolProbity

\*\* Due to the anisotropic diffraction data, the completeness of the highest resolution shell is low. The resolution limits here are for the a\*, b\* and c\* axes.
